# Supplementary material
Source: Springer Nature journal article supplement (https://www.springermedizin.de/resource/supplementary/12883_2014_1154_MOESM1_ESM.pdf/9456440)
Supplement: MOESM1 [file 9456440]

**A** Men (55-71 years)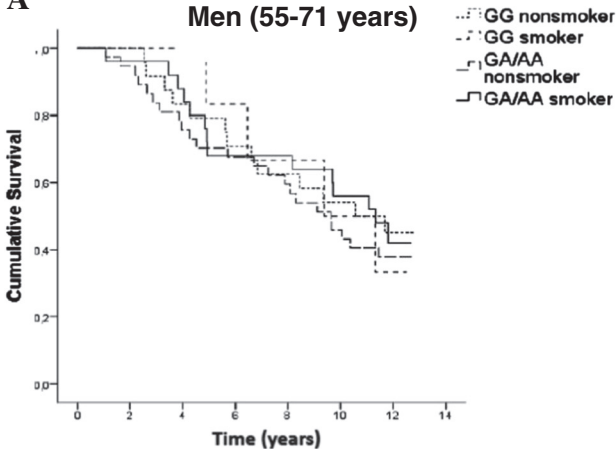

|          |    |    |    |    |    |    |   |                         |
|----------|----|----|----|----|----|----|---|-------------------------|
| Patients | 24 | 23 | 19 | 16 | 14 | 12 | 5 | FGB-455 GG nonsmoker    |
| At risk  | 6  | 6  | 5  | 4  | 3  | 2  | 0 | FGB-455 GG smoker       |
|          | 37 | 34 | 27 | 24 | 21 | 16 | 7 | FGB-455 GA/AA nonsmoker |
|          | 25 | 23 | 21 | 16 | 16 | 13 | 2 | FGB-455 GA/AA smoker    |

**B** Men (72-85 years)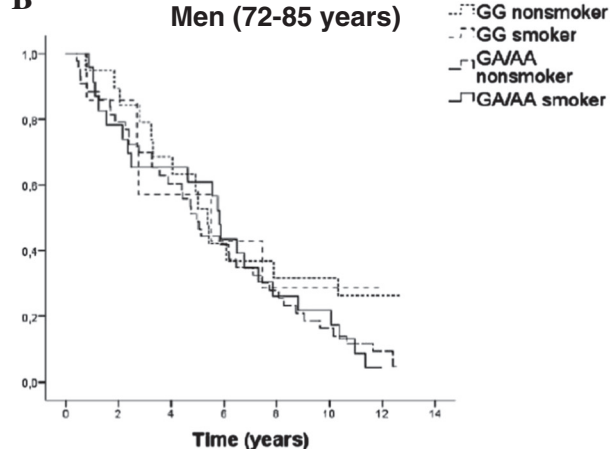

|          |    |    |    |    |    |   |   |                        |
|----------|----|----|----|----|----|---|---|------------------------|
| Patients | 19 | 16 | 13 | 7  | 5  | 5 | 2 | FGB-455GG nonsmoker    |
| At risk  | 7  | 5  | 3  | 2  | 1  | 1 | 0 | FGB-455GG smoker       |
|          | 43 | 33 | 25 | 17 | 11 | 6 | 1 | FGB-455GA/AA nonsmoker |
|          | 23 | 17 | 14 | 9  | 5  | 4 | 0 | FGB-455GA/AA smoker    |

**C** Women (55-71 years)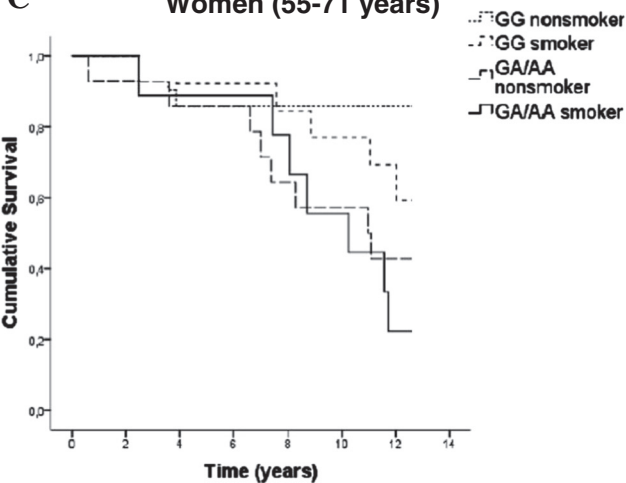

|          |    |    |    |    |    |    |    |                        |
|----------|----|----|----|----|----|----|----|------------------------|
| Patients | 78 | 65 | 51 | 32 | 25 | 19 | 10 | FGB-455GG nonsmoker    |
| At risk  | 13 | 13 | 12 | 11 | 10 | 9  | 6  | FGB-455GG smoker       |
|          | 51 | 48 | 40 | 37 | 31 | 25 | 13 | FGB-455GA/AA nonsmoker |
|          | 70 | 59 | 51 | 40 | 35 | 27 | 8  | FGB-455GA/AA smoker    |

**D** Women (72-85 years)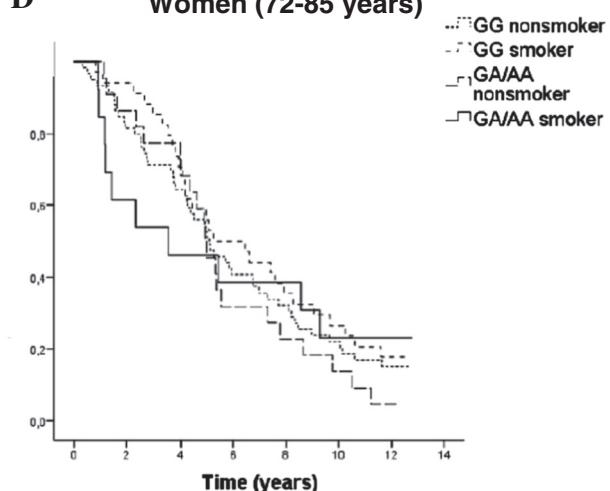

|          |    |    |    |    |    |    |   |                         |
|----------|----|----|----|----|----|----|---|-------------------------|
| Patients | 59 | 47 | 37 | 23 | 18 | 12 | 6 | FGB-455GG nonsmoker     |
| At risk  | 34 | 31 | 23 | 16 | 11 | 8  | 3 | FGB-455GG smoker        |
|          | 22 | 18 | 15 | 6  | 4  | 2  | 0 | FGB-455 GA/AA nonsmoker |
|          | 13 | 8  | 6  | 5  | 4  | 2  | 1 | FGB-455GA/AA smoker     |
